# Supplementary material for: Preoperative electroacupuncture versus sham electroacupuncture for the treatment of postoperative ileus after laparoscopic surgery for colorectal cancer in China: a study protocol for a multicentre, randomised, sham-controlled trial
Source: HighWire-hosted journal article supplement (doi:10.1136/bmjopen-2023-083460), 2024-07-01
Supplement: bmjopen-2023-083460supp006_data_supplement.pdf [file bmjopen-2023-083460supp006_data_supplement.pdf]

## Supplementary file 6: Blinding Questionnaire

### Blinding Questionnaire

Which one acupuncture treatment do you think you accepted?

- ☐ Acupuncture
- ☐ Sham acupuncture
