# Supplementary material for: Preoperative electroacupuncture versus sham electroacupuncture for the treatment of postoperative ileus after laparoscopic surgery for colorectal cancer in China: a study protocol for a multicentre, randomised, sham-controlled trial
Source: HighWire-hosted journal article supplement (doi:10.1136/bmjopen-2023-083460), 2024-07-01
Supplement: bmjopen-2023-083460supp007_data_supplement.pdf [file bmjopen-2023-083460supp007_data_supplement.pdf]

Supplementary file 7: Credibility/ Expectancy Questionnaire

Credibility/ Expectancy Questionnaire (CEQ)

1. At this point, how logical does the therapy offered to you seem?

123456789

not at all logicalsomewhat logicalvery logical

2. At this point, how useful do you think this treatment will be in reducing your trauma symptoms?

123456789

not at all usefulsomewhat usefulvery useful

3. How confident would you be in recommending this treatment to a friend who experience similar problems?

123456789

not at all confidentsomewhat confidentvery confident

4. By the end of the therapy period, how much improvement in your trauma symptoms do you think will occur?

0%10%20%30%40%50%60%70%80%90%100%

5. At this point, how much do you really *feel* that therapy will help you to reduce your trauma symptoms?

123456789

not at allsomewhatvery much

6. By the end of the therapy period, how much improvement in your trauma symptoms do you feel will occur?

0%10%20%30%40%50%60%70%80%90%100%
